# Supplementary material
Source: publisher figshare collection journal article supplement (https://sage.figshare.com/ndownloader/files/22810289)
Supplement: Supplementary file 1 [file 22810289]

Online Supplement

Table S1. *Study 1: Standardized Factor Loadings in the Stacked Measurement Model.*

| Items | C’s perception of E’s poor voice quality (Wk 3) | C’s judgment of E’s incompetence  (Wk 4) | E being ostracized  (Wk 5) | E’s self-perception of poor voice quality  (Wk 6) |
| --- | --- | --- | --- | --- |
|  |  |  |  |  |
| C’s perception of E’s poor voice quality (Wk 3) #1 | .85** |  |  |  |
| C’s perception of E’s poor voice quality (Wk 3) #2 | .89** |  |  |  |
| C’s perception of E’s poor voice quality (Wk 3) #3 | .86** |  |  |  |
| C’s perception of E’s poor voice quality (Wk 3) #4 | .92** |  |  |  |
| C’s perception of E’s poor voice quality (Wk 3) #5 | .88** |  |  |  |
|  |  |  |  |  |
| C’s judgment of E’s incompetence (Wk 4) #1 |  | .84** |  |  |
| C’s judgment of E’s incompetence (Wk 4) #2 |  | .78** |  |  |
| C’s judgment of E’s incompetence (Wk 4) #3 |  | .87** |  |  |
|  |  |  |  |  |
| E being ostracized (Wk 5) #1 |  |  | .78** |  |
| E being ostracized (Wk 5) #2 |  |  | .85** |  |
| E being ostracized (Wk 5) #3 |  |  | .89** |  |
| E being ostracized (Wk 5) #4 |  |  | .94** |  |
| E being ostracized (Wk 5) #5 |  |  | .92** |  |
| E being ostracized (Wk 5) #6 |  |  | .91** |  |
| E being ostracized (Wk 5) #7 |  |  | .91** |  |
| E being ostracized (Wk 5) #8 |  |  | .95** |  |
| E being ostracized (Wk 5) #9 |  |  | .93** |  |
| E being ostracized (Wk 5) #10 |  |  | .83** |  |
|  |  |  |  |  |
| E’s self-perception of poor voice quality (Wk 6) #1 |  |  |  | .83** |
| E’s self-perception of poor voice quality (Wk 6) #2 |  |  |  | .87** |
| E’s self-perception of poor voice quality (Wk 6) #3 |  |  |  | .91** |
| E’s self-perception of poor voice quality (Wk 6) #4 |  |  |  | .93** |
| E’s self-perception of poor voice quality (Wk 6) #5 |  |  |  | .85** |
|  |  |  |  |  |

Table S1. *Continued.*

| Items | E’s perception of C’s poor voice quality  (Wk 6) |
| --- | --- |
|  |  |
| E’s perception of C’s poor voice quality (Wk 6) #1 | .88** |
| E’s perception of C’s poor voice quality (Wk 6) #2 | .91** |
| E’s perception of C’s poor voice quality (Wk 6) #3 | .90** |
| E’s perception of C’s poor voice quality (Wk 6) #4 | .91** |
| E’s perception of C’s poor voice quality (Wk 6) #5 | .86** |
|  |  |
|  |  |

*Note.* N= 294;** *p* < .01; # item number; E = the employee; C = the coworker.

Table S2. *Study 1: Empirical Distinctiveness of the Latent Constructs.*

|  | *Factor correlations* | | | | | |
| --- | --- | --- | --- | --- | --- | --- |
|  | C’s perception of E’s poor voice quality  (Wk 3) | C’s judgment of E’s incompetence (Wk 4) | E being ostracized  (Wk 5) | E’s self-perception of poor voice quality  (Wk 6) | E’s perception of C’s poor voice quality  (Wk 6) | |
| C’s perception of E’s poor voice quality (Wk 3) | -- |  |  |  |  | |
| C’s judgment of E’s incompetence (Wk 4) | .40** | -- |  |  |  | |
| E being ostracized (Wk 5) | .32** | .25** | -- |  |  | |
| E’s self-perception of poor voice quality (Wk 6) | .33** | .08 | .47** | -- |  | |
| E’s perception of C’s poor voice quality (Wk 6) | .24** | .07 | .42** | .62** | -- | |
|  | *Change in χ2 after the two scales were combined to represent one construct* | | | | | |
|  | C’s perception of E’s poor voice quality  (Wk 3) | C’s judgment of E’s incompetence (Wk 4) | E being ostracized  (Wk 5) | E’s self-  perception of  poor voice  quality  (Wk 6) | | E’s perception of C’s poor voice quality  (Wk 6) |
| C’s perception of E’s poor voice quality (Wk 3) | -- |  |  |  | |  |
| C’s judgment of E’s incompetence (Wk 4) | 381.64** | -- |  |  | |  |
| E being ostracized (Wk 5) | 1293.55** | 446.24** | -- |  | |  |
| E’s self-perception of poor voice quality (Wk 6) | 1377.69** | 1464.49** | 1248.58** | -- | |  |
| E’s perception of C’s poor voice quality (Wk 6) | 1494.18** | 1569.28** | 1345.31** | 929.28** | | -- |

*Note.* N= 294;** *p* < .01; * *p* < .05; E = the employee; C = the coworker; χ 2 = chi-squared value.

Table S3. *Study 1: Standardized Factor Loadings in the Measurement Models of Poor Voice Quality Scales.*

|  | Univariate measurement models: | | |
| --- | --- | --- | --- |
| Items | C’s perception of E’s poor voice quality (Wk 3) | E’s self-perception of poor voice quality  (Wk 6) | E’s perception of C’s poor voice quality (Wk6) |
| C’s perception of E’s poor voice quality (Wk 3) #1 | .85** |  |  |
| C’s perception of E’s poor voice quality (Wk 3) #2 | .89** |  |  |
| C’s perception of E’s poor voice quality (Wk 3) #3 | .86** |  |  |
| C’s perception of E’s poor voice quality (Wk 3) #4 | .92** |  |  |
| C’s perception of E’s poor voice quality (Wk 3) #5 | .88** |  |  |
|  |  |  |  |
| E’s self-perception of poor voice quality (Wk 6) #1 |  | .83** |  |
| E’s self-perception of poor voice quality (Wk 6) #2 |  | .87** |  |
| E’s self-perception of poor voice quality (Wk 6) #3 |  | .90** |  |
| E’s self-perception of poor voice quality (Wk 6) #4 |  | .94** |  |
| E’s self-perception of poor voice quality (Wk 6) #5 |  | .85** |  |
|  |  |  |  |
| E’s perception of C’s poor voice quality (Wk 6) #1 |  |  | .88** |
| E’s perception of C’s poor voice quality (Wk 6) #2 |  |  | .91** |
| E’s perception of C’s poor voice quality (Wk 6) #3 |  |  | .90** |
| E’s perception of C’s poor voice quality (Wk 6) #4 |  |  | .92** |
| E’s perception of C’s poor voice quality (Wk 6) #5 |  |  | .85** |
|  |  |  |  |
| χ2 (df) | 58.03** (5) | 97.22** (5) | 38.94** (5) |
| TLI | .92 | .87 | .95 |
| CFI | .96 | .94 | .98 |
| RMSEA | .19 | .25 | .15 |
| SRMR | .02 | .03 | .02 |

Table S3. *Continued.*

|  | C’s perception E’s poor voice quality (Wk 3), E’s self-perception of poor voice quality (Wk 6) | C’s perception E’s poor voice quality (Wk 3), E’s perception of C’s poor voice quality (Wk 6) | E’s self-perception of poor voice quality (Wk 6), E’s perception of C’s poor voice quality (Wk 6) | All three scales of poor voice quality |
| --- | --- | --- | --- | --- |
| C’s perception of E’s poor voice quality (Wk 3) #1 | .85** | .85** |  | .85** |
| C’s perception of E’s poor voice quality (Wk 3) #2 | .89** | .89** |  | .89** |
| C’s perception of E’s poor voice quality (Wk 3) #3 | .86** | .86** |  | .86** |
| C’s perception of E’s poor voice quality (Wk 3) #4 | .92** | .92** |  | .92** |
| C’s perception of E’s poor voice quality (Wk 3) #5 | .88** | .88** |  | .88** |
|  |  |  |  |  |
| E’s self-perception of poor voice quality (Wk 6) #1 | .83** |  | .83** | .83** |
| E’s self-perception of poor voice quality (Wk 6) #2 | .87** |  | .87** | .87** |
| E’s self-perception of poor voice quality (Wk 6) #3 | .91** |  | .91** | .91** |
| E’s self-perception of poor voice quality (Wk 6) #4 | .94** |  | .93** | .93** |
| E’s self-perception of poor voice quality (Wk 6) #5 | .85** |  | .86** | .85** |
|  |  |  |  |  |
| E’s perception of C’s poor voice quality (Wk 6) #1 |  | .88** | .88** | .88** |
| E’s perception of C’s poor voice quality (Wk 6) #2 |  | .91** | .91** | .91** |
| E’s perception of C’s poor voice quality (Wk 6) #3 |  | .90** | .91** | .91** |
| E’s perception of C’s poor voice quality (Wk 6) #4 |  | .92** | .91** | .91** |
| E’s perception of C’s poor voice quality (Wk 6) #5 |  | .85** | .86** | .86** |
|  |  |  |  |  |
|  |  |  |  |  |
| χ2 (df) | 190.81** (34) | 121.53** (34) | 188.40** (34) | 303.95** (87) |
| TLI | .93 | .96 | .93 | .94 |
| CFI | .95 | .97 | .95 | .95 |
| RMSEA | .13 | .09 | .12 | .09 |
| SRMR | .04 | .03 | .03 | .04 |

*Notes*. ** *p* < .01; # item number; E = the employee; C = the coworker; χ 2 = chi-squared value; df = degree of freedom; TLI = Tucker-Lewis Index; CFI = Comparative Fit Index; RMSEA = Root Mean Squared Error of Approximation; SRMR = Standardized Root Mean Squared Residual.
